# Supplementary material
Source: HighWire-hosted journal article supplement (https://bmjopenquality.bmj.com/highwire/filestream/136068/field_highwire_adjunct_files/1/ds3400.docx)
Supplement: ds3400.docx [file ds3400.docx]

**Percentage of Patients Prescribed A Regular Laxative Over a 5 Month Period**

% of

Patients

Month of Project

**Profile of Laxatives Prescribed over a 5 month Period**

Month of Project

Patients

On A

Laxative

**Patients Prescribed a “PRN” Laxative Over the 5 Month Period**

% of

Patients

Month of Project
